# Supplementary material for: Racialized Heteroscedasticity in Neuroimaging Features, Behavior Measures, and Neuroimaging-Based Predictive Models
Source: Research Square preprint supplement (doi:10.21203/rs.3.rs-9557211/v1), 2026-06-28
Supplement: Supplementary file 2 [file 6cb98611009a601957c29020.xlsx]

## Sheet: Index
Table	Title
Supplementary Table 1	Demographics of participants
Supplementary Table 2	Predictive model performance broken down by race
Supplementary Table 3	Variance differences in predictive models after corrections
Supplementary Table 4	Levene's test on CPM summary statistics
Supplementary Table 5	Breusch-Pagan test results evaluating heteroscedasticity in residuals across behavioral outcomes CPM values
Supplementary Table 6	The skewness values for residuals across for CPM summary statistics, stratified by racial groups
Supplementary Table 7	Artificial neural network (ANN) architecture

## Sheet: Supplementary Table 1
Supplementary Table 1. Demographics of participants. This table presents the demographic distribution of participants included in this study after excluding records with missing values. The final dataset consists of 4,736 individuals identified as either Black or White. The participants' ages range from 107 to 133 months, with a mean age of 119.62 months (± 7.49 SD), indicating a fairly narrow ag…
Variable	Summary
Total Participants	4736
Age in months (mean ± SD)	119.62 ± 7.49
Age in months (range)	107–133
Gender	Count
Female	2395
Male	2341
Race	Count
White	3892
Black	844

## Sheet: Supplementary Table 2
Supplementary Table 2. Predictive model performance broken down by race. Prediction performance is reported as the correlation between predicted and observed (r), as well as the mean squared error, for all (r, mse), Black (r_b, mse_b), and White (r_w, mse_b) participants. These results are for the uncorrected CPM models. "pval" reflects the significance of the correlation based on 500 permutation…
behavior	r	pval	r_b	r_w	mse	mse_b	mse_w
nihtbx_cryst_uncorrected	0.262391	0.002	0.222696	0.152298	0.93707	1.06784	0.908788
nihtbx_totalcomp_uncorrected	0.253472	0.002	0.198186	0.158322	0.94051	1.21918	0.87993
nihtbx_picvocab_uncorrected	0.248119	0.002	0.199326	0.130157	0.943917	1.06334	0.91787
nihtbx_reading_uncorrected	0.204282	0.002	0.188783	0.149315	0.968158	1.10993	0.937413
nihtbx_fluidcomp_uncorrected	0.191534	0.002	0.151102	0.128396	0.969496	1.21374	0.916433
pea_wiscv_trs	0.17889	0.002	0.140015	0.112432	0.978748	1.1688	0.937504
nihtbx_list_uncorrected	0.164085	0.002	0.151176	0.0880153	0.986696	1.17815	0.945221
nihtbx_cardsort_uncorrected	0.152479	0.002	0.11127	0.107904	0.986867	1.38564	0.900185
lmt_scr_perc_correct	0.151638	0.002	0.167632	0.0922791	0.986985	0.918715	1.00171
pea_ravlt_ld_trial_vii_tc	0.141477	0.002	0.149034	0.0786267	0.991337	1.11207	0.964974
pps_y_ss_number	0.136879	0.002	0.0637142	0.117766	0.991215	1.28562	0.927469
pea_ravlt_sd_trial_vi_tc	0.136542	0.002	0.168064	0.0663116	0.993082	1.13848	0.961549
pps_y_ss_severity_score	0.133431	0.002	0.0905487	0.102322	0.993468	1.53711	0.875916
bis_y_ss_bas_drive	0.125132	0.002	0.1171	0.0765142	1.00044	1.17567	0.962673
nihtbx_picture_uncorrected	0.123555	0.002	0.102231	0.0834419	0.995486	0.969619	1.00079
upps_y_ss_positive_urgency	0.122552	0.002	0.0950765	0.0844667	0.997221	1.21554	0.949679
cbcl_scr_syn_attention_r	0.11815	0.002	0.0842482	0.121688	0.993781	1.20242	0.948523
cbcl_scr_syn_rulebreak_r	0.115523	0.002	0.111248	0.0784984	1.01035	1.59082	0.883803
nihtbx_pattern_uncorrected	0.113665	0.002	0.0579292	0.10156	1.00017	1.08837	0.981332
pgbi_p_ss_score	0.10929	0.002	0.0741093	0.0858698	1.01388	1.88374	0.825555
bis_y_ss_bas_rr	0.0980883	0.002	0.0613239	0.0661504	1.01041	1.0224	1.00796
nihtbx_flanker_uncorrected	0.0955175	0.002	0.100353	0.0522204	1.01466	1.51432	0.905979
lmt_scr_efficiency	0.0937951	0.002	0.0777903	0.0637774	1.0178	0.976537	1.02702
upps_y_ss_sensation_seeking	0.0836199	0.002	0.0708339	0.0776376	1.03516	1.14784	1.011
cbcl_scr_syn_thought_r	0.0815786	0.004	0.0431296	0.0895489	1.00931	1.15481	0.977658
cbcl_scr_syn_social_r	0.0809025	0.002	0.0465826	0.0717515	1.02243	1.26983	0.968508
cbcl_scr_syn_aggressive_r	0.0710142	0.002	0.0519579	0.0712817	1.03148	1.34324	0.964111
lmt_scr_rt_correct	0.0662392	0.006	0.0613366	0.0478588	1.02336	1.32927	0.957168
cbcl_scr_syn_anxdep_r	0.0608305	0.002	0.0339156	0.055417	1.02342	0.928912	1.04387
bis_y_ss_bas_fs	0.0598672	0.006	0.0612716	0.0318183	1.03738	1.14582	1.01348
upps_y_ss_lack_of_perseverance	0.0505732	0.008	0.0113032	0.0578027	1.02844	1.06767	1.02
upps_y_ss_negative_urgency	0.0504075	0.012	0.0266861	0.0467596	1.03299	1.27594	0.980318
upps_y_ss_lack_of_planning	0.0498943	0.022	0.0398802	0.0449178	1.03344	1.2127	0.994247
cbcl_scr_syn_withdep_r	0.0353211	0.098	0.025085	0.0342285	1.05965	1.24772	1.01901
cbcl_scr_syn_somatic_r	0.0300402	0.15	-0.0465814	0.0466891	1.06109	1.10868	1.05078
bis_y_ss_bis_sum	0.00657067	0.77	0.00511631	0.00241448	1.09599	1.22042	1.06884

## Sheet: Supplementary Table 3
Supplementary Table 3. Variance differences in predictive models after corrections. Correlations between predicted and observed (r), variance differences between Black and White participants (var_diff) and p values for the variance differences (pval_var_diff) are reported for three types of models: a baseline model, a model with balanced sample sizes by race, and a model with balanced sample size…
behavior	r	pval	var_diff	pval_var_diff	r_balanced	var_diff_balanced	pval_var_diff_balanced	r_all_corrections	var_diff_all_corrections	pval_var_diff_all_corrections
nihtbx_cryst_uncorrected	0.262391	0.002	0.0159504	0.015	0.309256	0.0196651	0.04	0.156108	0.016284	0.08
nihtbx_totalcomp_uncorrected	0.253472	0.002	0.00855932	0.086	0.31157	0.0149878	0.07	0.157632	0.00565114	0.284
nihtbx_picvocab_uncorrected	0.248119	0.002	0.0148894	0.011	0.308315	0.0163147	0.072	0.153027	0.0241325	0.029
nihtbx_reading_uncorrected	0.204282	0.002	0.00544367	0.152	0.233136	0.0157655	0.041	0.126813	-0.00596254	0.692
nihtbx_fluidcomp_uncorrected	0.191534	0.002	0.00326033	0.245	0.235436	0.00595959	0.272	0.131485	0.00129792	0.459
pea_wiscv_trs	0.17889	0.002	0.0005539	0.454	0.214864	0.00721829	0.214	0.102709	-0.0152827	0.906
nihtbx_list_uncorrected	0.164085	0.002	0.000121752	0.488	0.196357	0.00261819	0.374	0.0636644	-0.00330601	0.586
nihtbx_cardsort_uncorrected	0.152479	0.002	0.00209772	0.261	0.184044	0.00982264	0.129	0.0879263	0.00812207	0.268
lmt_scr_perc_correct	0.151638	0.002	-0.00225131	0.759	0.199958	0.00320792	0.36	0.106065	0.00399823	0.327
pea_ravlt_ld_trial_vii_tc	0.141477	0.002	0.00187854	0.266	0.193629	0.0089932	0.138	0.0906804	0.0174166	0.07
pps_y_ss_number	0.136879	0.002	-0.00390177	0.939	0.131287	-0.00846362	0.875	0.0513832	0.00253843	0.41
pea_ravlt_sd_trial_vi_tc	0.136542	0.002	0.00132987	0.353	0.190235	0.00727605	0.163	0.0846748	0.0123012	0.129
pps_y_ss_severity_score	0.133431	0.002	-0.00269988	0.848	0.137868	-0.0047336	0.746	0.0718963	0.00580344	0.269
bis_y_ss_bas_drive	0.125132	0.002	0.00525514	0.072	0.147899	0.0123326	0.073	0.0641449	0.00951339	0.194
nihtbx_picture_uncorrected	0.123555	0.002	0.000214258	0.469	0.170759	0.00381117	0.321	0.0971366	-0.00270706	0.62
upps_y_ss_positive_urgency	0.122552	0.002	0.00140208	0.316	0.141463	0.00632055	0.236	0.0682608	-0.00055633	0.511
cbcl_scr_syn_attention_r	0.11815	0.002	-0.0042656	0.943	0.115537	-0.00546588	0.745	0.0761394	-0.0205806	0.988
cbcl_scr_syn_rulebreak_r	0.115523	0.002	0.018673	0.001	0.14103	0.0339206	0.002	0.0657317	0.026575	0.02
nihtbx_pattern_uncorrected	0.113665	0.002	0.00414441	0.139	0.105792	0.00284101	0.371	0.0912702	0.00245099	0.425
pgbi_p_ss_score	0.10929	0.002	0.0134683	0.001	0.112174	0.0219865	0.021	0.0395937	0.00741194	0.243
bis_y_ss_bas_rr	0.0980883	0.002	0.00343503	0.162	NA	NA	NA	NA	NA	NA
nihtbx_flanker_uncorrected	0.0955175	0.002	0.00142629	0.332	NA	NA	NA	NA	NA	NA
lmt_scr_efficiency	0.0937951	0.002	-0.00281389	0.794	NA	NA	NA	NA	NA	NA
upps_y_ss_sensation_seeking	0.0836199	0.002	0.00166029	0.373	NA	NA	NA	NA	NA	NA
cbcl_scr_syn_thought_r	0.0815786	0.004	-0.00820679	1.001	NA	NA	NA	NA	NA	NA
cbcl_scr_syn_social_r	0.0809025	0.002	-0.000627353	0.592	NA	NA	NA	NA	NA	NA
cbcl_scr_syn_aggressive_r	0.0710142	0.002	0.00604063	0.081	NA	NA	NA	NA	NA	NA
lmt_scr_rt_correct	0.0662392	0.006	-0.00430886	0.937	NA	NA	NA	NA	NA	NA
cbcl_scr_syn_anxdep_r	0.0608305	0.002	-0.0125406	1.001	NA	NA	NA	NA	NA	NA
bis_y_ss_bas_fs	0.0598672	0.006	0.00878812	0.021	NA	NA	NA	NA	NA	NA
upps_y_ss_lack_of_perseverance	0.0505732	0.008	-0.00692294	0.994	NA	NA	NA	NA	NA	NA
upps_y_ss_negative_urgency	0.0504075	0.012	0.00571084	0.063	NA	NA	NA	NA	NA	NA
upps_y_ss_lack_of_planning	0.0498943	0.022	-0.00814826	0.997	NA	NA	NA	NA	NA	NA
cbcl_scr_syn_withdep_r	0.0353211	0.098	0.00333284	0.215	NA	NA	NA	NA	NA	NA
cbcl_scr_syn_somatic_r	0.0300402	0.15	-0.0113473	0.994	NA	NA	NA	NA	NA	NA
bis_y_ss_bis_sum	0.00657067	0.77	-0.00302415	0.726	NA	NA	NA	NA	NA	NA

## Sheet: Supplementary Table 4
Supplementary Table 4. Levene's test on CPM summary statistics. The table presents results of Levene's test for variance differences in CPM scores across 36 behavioral measures, including the p-value (p_behavior), F-statistic (f_behavior), and standard deviations for Black (b_sd) and White (w_sd) participants. The behavioral measures are ordered by p-value in descending order. These results highl…
measure	p_cpm	f_cpm	b_sd	w_sd
cbcl_scr_syn_rulebreak_r_total_cpm**	3.34e-10	39.63	656.7	560.35
pgbi_p_ss_score_total_cpm**	1.22e-09	37.09	613.86	538.02
cbcl_scr_syn_anxdep_r_total_cpm**	3.12e-07	26.25	560.28	663.67
nihtbx_picvocab_uncorrected_total_cpm**	1.64e-06	23.03	743.46	677.42
bis_y_ss_bas_fs_total_cpm**	4.76e-06	20.98	503.23	454.13
nihtbx_cryst_uncorrected_total_cpm**	9e-06	19.76	680.86	619.76
cbcl_scr_syn_thought_r_total_cpm**	0.000112	14.94	713.47	810.02
bis_y_ss_bas_drive_total_cpm**	0.000418	12.47	635.45	594.89
cbcl_scr_syn_somatic_r_total_cpm**	0.000578	11.86	394.85	440.35
upps_y_ss_lack_of_perseverance_total_cpm*	0.00174	9.81	567.66	616.19
upps_y_ss_negative_urgency_total_cpm*	0.00461	8.03	561.33	532.34
upps_y_ss_lack_of_planning_total_cpm*	0.00488	7.93	529.77	574.74
nihtbx_totalcomp_uncorrected_total_cpm*	0.01	6.8	751.97	707.54
cbcl_scr_syn_aggressive_r_total_cpm*	0.02	5.34	533.11	508.99
bis_y_ss_bas_rr_total_cpm	0.06	3.41	598.89	574.4
pea_ravlt_ld_trial_vii_tc_total_cpm	0.07	3.37	705.04	679.09
cbcl_scr_syn_attention_r_total_cpm	0.08	3.12	861.21	917.81
nihtbx_flanker_uncorrected_total_cpm	0.09	2.89	583.94	561.02
nihtbx_cardsort_uncorrected_total_cpm	0.15	2.08	738.12	714.88
nihtbx_reading_uncorrected_total_cpm	0.16	2.01	642.45	613.48
pps_y_ss_number_total_cpm	0.17	1.86	758.66	791.84
nihtbx_fluidcomp_uncorrected_total_cpm	0.21	1.56	781.57	756.32
nihtbx_pattern_uncorrected_total_cpm	0.21	1.54	723.35	697.25
pea_ravlt_sd_trial_vi_tc_total_cpm	0.22	1.52	698.49	676.97
upps_y_ss_positive_urgency_total_cpm	0.24	1.39	704.96	690.87
lmt_scr_rt_correct_total_cpm	0.26	1.24	576.03	597.29
cbcl_scr_syn_withdep_r_total_cpm	0.29	1.14	442.33	433.45
pea_wiscv_trs_total_cpm	0.42	0.66	639.14	629.81
nihtbx_picture_uncorrected_total_cpm	0.47	0.51	741.75	737.09
nihtbx_list_uncorrected_total_cpm	0.52	0.42	600.04	589.61
pps_y_ss_severity_score_total_cpm	0.68	0.17	769.59	789.45
cbcl_scr_syn_social_r_total_cpm	0.74	0.11	556.5	556.79
bis_y_ss_bis_sum_total_cpm	0.77	0.09	335.38	332.78
lmt_scr_perc_correct_total_cpm	0.77	0.09	676.24	680.71
upps_y_ss_sensation_seeking_total_cpm	0.77	0.08	463.06	456.4
lmt_scr_efficiency_total_cpm	0.88	0.02	514.4	522.13

## Sheet: Supplementary Table 5
Supplementary Table 5. Breusch-Pagan test results evaluating heteroscedasticity in residuals across brain-behavior summary scores. The BP statistic (bp_stat) measures whether residuals are heteroscedasticity, with higher values and low p-values (bp_p_value) (p < 0.05) indicating significance. The table also reports the residual standard deviations for Black (b_sd) and White (w_sd) participants.
measure	bp_stat	bp_p_value	b_sd	w_sd
pea_ravlt_sd_trial_vi_tc	41.3112	1.07e-09	3.08896	2.82275
pea_ravlt_ld_trial_vii_tc	20.4096	3.7e-05	3.20198	2.96982
pea_wiscv_trs	26.0875	2.16e-06	3.78389	3.44065
nihtbx_flanker_uncorrected	106.545	7.31e-24	10.297	7.84582
nihtbx_list_uncorrected	55.6187	8.37e-13	12.1906	10.9011
nihtbx_cardsort_uncorrected	61.7813	3.84e-14	10.1293	8.24473
nihtbx_reading_uncorrected	5.09492	0.0782803	6.68711	6.20278
nihtbx_pattern_uncorrected	7.1555	0.0279385	14.6363	14.0861
nihtbx_picture_uncorrected	3.45898	0.177375	11.2501	11.7792
nihtbx_picvocab_uncorrected	1.70598	0.426138	7.62081	7.4669
nihtbx_fluidcomp_uncorrected	29.0583	4.9e-07	10.4738	9.4482
nihtbx_cryst_uncorrected	2.08595	0.352406	6.64	6.34157
nihtbx_totalcomp_uncorrected	38.8165	3.72e-09	8.67402	7.81147
lmt_scr_perc_correct	0.216518	0.897395	0.159942	0.167997
lmt_scr_rt_correct	35.0429	2.46e-08	519.368	438.071
lmt_scr_efficiency	2.09198	0.351344	0.0676708	0.0691931
cbcl_scr_syn_anxdep_r	120.28	7.61e-27	2.90861	3.08568
cbcl_scr_syn_withdep_r	213.342	4.71e-47	1.74594	1.57352
cbcl_scr_syn_somatic_r	149.169	4.06e-33	1.91732	1.90192
cbcl_scr_syn_social_r	123.795	1.31e-27	2.31233	2.02003
cbcl_scr_syn_thought_r	78.7467	7.95e-18	2.22109	2.05118
cbcl_scr_syn_attention_r	73.9895	8.58e-17	3.65021	3.26822
cbcl_scr_syn_rulebreak_r	130.258	5.19e-29	2.10659	1.55559
cbcl_scr_syn_aggressive_r	173.222	2.43e-38	4.60233	3.8961
pgbi_p_ss_score	207.156	1.04e-45	3.48249	2.29184
pps_y_ss_number	87.0369	1.26e-19	3.63817	3.12902
pps_y_ss_severity_score	95.645	1.7e-21	11.2734	8.52342
upps_y_ss_negative_urgency	62.9703	2.12e-14	2.87664	2.52212
upps_y_ss_positive_urgency	41.2146	1.12e-09	3.1471	2.79109
upps_y_ss_lack_of_planning	18.717	8.62e-05	2.48905	2.24101
upps_y_ss_lack_of_perseverance	38.8324	3.7e-09	2.20262	2.16492
upps_y_ss_sensation_seeking	3.16065	0.205908	2.80954	2.63339
bis_y_ss_bis_sum	19.4207	6.07e-05	3.87673	3.59564
bis_y_ss_bas_rr	4.58202	0.101164	2.87045	2.86509
bis_y_ss_bas_drive	86.7116	1.48e-19	3.12619	2.80639
bis_y_ss_bas_fs	15.4242	0.000447385	2.73106	2.55039

## Sheet: Supplementary Table 6
Supplementary Table 6. The skewness values for residuals across for brain-behavior summary scores, stratified by racial groups. Positive skewness values indicate a right-skewed distribution, where residuals are more concentrated at lower values with a longer tail on the right, whereas negative skewness suggests a left-skewed distribution.
Behaviors	White	Black
pea_ravlt_sd_trial_vi_tc	-0.522053	-0.46966
pea_ravlt_ld_trial_vii_tc	-0.411269	-0.39099
pea_wiscv_trs	-0.20587	-0.268896
nihtbx_flanker_uncorrected	-0.745287	-0.774266
nihtbx_list_uncorrected	-0.353741	-0.324137
nihtbx_cardsort_uncorrected	-0.437587	-0.746803
nihtbx_reading_uncorrected	0.44478	0.0935279
nihtbx_pattern_uncorrected	-0.189852	-0.122684
nihtbx_picture_uncorrected	0.142964	0.374038
nihtbx_picvocab_uncorrected	0.260328	0.331646
nihtbx_fluidcomp_uncorrected	-0.13566	-0.215677
nihtbx_cryst_uncorrected	0.334817	0.210473
nihtbx_totalcomp_uncorrected	-0.0633142	-0.185771
lmt_scr_perc_correct	0.0785874	0.490203
lmt_scr_rt_correct	-0.241377	-0.206076
lmt_scr_efficiency	0.209917	0.334044
cbcl_scr_syn_anxdep_r	1.7091	2.13126
cbcl_scr_syn_withdep_r	2.27304	2.22114
cbcl_scr_syn_somatic_r	1.70292	1.52016
cbcl_scr_syn_social_r	2.13137	1.75206
cbcl_scr_syn_thought_r	2.13769	2.15167
cbcl_scr_syn_attention_r	1.51884	1.31051
cbcl_scr_syn_rulebreak_r	2.52942	1.9368
cbcl_scr_syn_aggressive_r	1.97075	1.85348
pgbi_p_ss_score	3.60222	2.93396
pps_y_ss_number	2.02803	1.5784
pps_y_ss_severity_score	2.97163	2.44492
upps_y_ss_negative_urgency	0.270858	0.138786
upps_y_ss_positive_urgency	0.551337	0.213125
upps_y_ss_lack_of_planning	0.656838	0.731362
upps_y_ss_lack_of_perseverance	0.797829	0.874118
upps_y_ss_sensation_seeking	0.0392746	0.0735665
bis_y_ss_bis_sum	0.266975	0.175566
bis_y_ss_bas_rr	-0.332528	-0.812001
bis_y_ss_bas_drive	0.761946	0.434243
bis_y_ss_bas_fs	0.312467	0.00423611

## Sheet: Supplementary Table 7
Supplementary Table 7. Artificial neural network (ANN) architecture. The model comprises three dense layers with progressively reduced output dimensions (64, 32, and 1), each followed by dropout layers to prevent overfitting. The majority of the model’s 2,291,969 trainable parameters are concentrated in the first dense layer, reflecting the high dimensionality of the input features.
Layer Name	Type	Output Shape	Parameters
dense_4332	Dense	(None, 64)	2289856
dropout_2888	Dropout	(None, 64)	0
dense_4333	Dense	(None, 32)	2080
dropout_2889	Dropout	(None, 32)	0
dense_4334	Dense	(None, 1)	33
Total Parameters			2291969
